# Supplementary material
Source: PubMed Central journal article supplement (PMC4816702)
Supplement: mmc1.pdf [file mmc1.pdf]

**Biophysical Journal, Volume 110**

**Supplemental Information**

**Determining Physical Properties of the Cell Cortex**

**Arnab Saha, Masatoshi Nishikawa, Martin Behrndt, Carl-Philipp Heisenberg, Frank Jülicher, and Stephan W. Grill**

# Supporting material: Determining physical properties of the cell cortex

A. Saha, M. Nishikawa, M. Behrndt , C.-P. Heisenberg, F. Jülicher, S. W. Grill

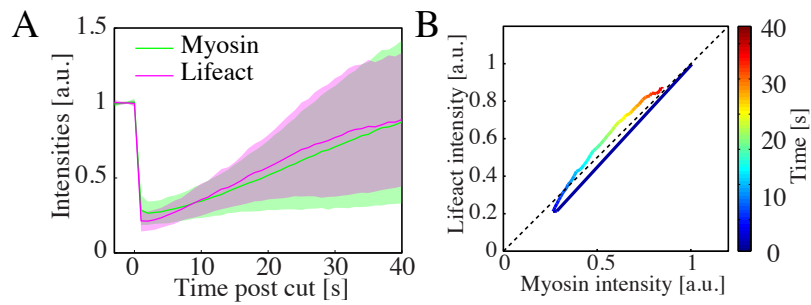

Figure S1: Recovery of myosin and lifeact fluorescence intensities in response to COLA. A: Fluorescence recovery timecourses of the two intensities, averaged over 4 independent experiments. Shaded area represents 95% confidence intervals. B: Fluorescence recovery trajectory in the phase plane of myosin and lifeact intensities. The cortex is ablated at  $t = 0s$ . Note that the graph indicates a linear relationship between actin and myosin fluorescence intensities.
